# Supplementary material for: On the multiphoton ionisation photoelectron spectra of phenol
Source: Royal Society of Chemistry journal article supplement (doi:10.1039/d3cp05559k), 2024-01-01
Supplement: d3cp05559k1.pdf [file d3cp05559k1.pdf]

## **SupplInfo for: On the multiphoton ionization photoelectron spectra of phenol**

Diptesh Dey, Joanne L. Woodhouse, Marcus P. Taylor, Helen H. Fielding,  
and Graham A. Worth

November 15, 2023

# 1 Ground state normal mode frequencies

**SI-Table 1** Calculated frequencies of vibrational modes, in  $\text{cm}^{-1}$  and electron volts, for the  $\tilde{X}^1A_1$  state of phenol calculated at the MP2/aug-cc-pVDZ level of theory. The  $C_{2v}$  symmetries are obtained by ignoring the O-H hydrogen atom.

| Mode       | Frequency        |       | Symmetry |          | Description                          |
|------------|------------------|-------|----------|----------|--------------------------------------|
|            | $\text{cm}^{-1}$ | eV    | $C_s$    | $C_{2v}$ |                                      |
| $\nu_1$    | 223              | 0.028 | $a''$    | $b_1$    | Out of plane C-O bend + ring torsion |
| $\nu_2$    | 332              | 0.041 | $a''$    | $b_1$    | Out of plane O-H bend                |
| $\nu_3$    | 397              | 0.049 | $a'$     | $b_2$    | In plane C-O-H bend                  |
| $\nu_4$    | 406              | 0.050 | $a''$    | $a_2$    | C-C twist                            |
| $\nu_5$    | 496              | 0.062 | $a''$    | $b_1$    | Out of plane C-O bend + ring torsion |
| $\nu_6$    | 520              | 0.065 | $a'$     | $a_1$    | Ring deformation + C-O stretch       |
| $\nu_7$    | 612              | 0.076 | $a'$     | $b_2$    | Ring deformation                     |
| $\nu_8$    | 613              | 0.076 | $a''$    | $b_1$    | Ring deformation                     |
| $\nu_9$    | 742              | 0.092 | $a''$    | $b_1$    | C-H bend out of plane                |
| $\nu_{10}$ | 812              | 0.101 | $a'$     | $a_1$    | Ring deformation + C-O stretch       |
| $\nu_{11}$ | 817              | 0.101 | $a''$    | $a_2$    | C-H bend                             |
| $\nu_{12}$ | 864              | 0.107 | $a''$    | $b_1$    | C-H bend out of plane                |
| $\nu_{13}$ | 910              | 0.113 | $a''$    | $a_2$    | C-H bend out of plane                |
| $\nu_{14}$ | 926              | 0.115 | $a''$    | $b_1$    | C-H bend out of plane                |
| $\nu_{15}$ | 998              | 0.124 | $a'$     | $a_1$    | Breathing mode                       |
| $\nu_{16}$ | 1035             | 0.128 | $a'$     | $a_1$    | C-H bend in plane                    |
| $\nu_{17}$ | 1083             | 0.134 | $a'$     | $b_2$    | C-H bend in plane                    |
| $\nu_{18}$ | 1161             | 0.144 | $a'$     | $b_2$    | C-H bend in plane                    |
| $\nu_{19}$ | 1176             | 0.146 | $a'$     | $a_1$    | C-H bend                             |
| $\nu_{20}$ | 1194             | 0.148 | $a'$     | $a_1$    | OH bend                              |
| $\nu_{21}$ | 1267             | 0.157 | $a'$     | $a_1$    | C-O stretch + C-C stretch            |
| $\nu_{22}$ | 1332             | 0.165 | $a'$     | $b_2$    | C-H bend                             |
| $\nu_{23}$ | 1471             | 0.182 | $a'$     | $b_2$    | C-C ring stretch                     |
| $\nu_{24}$ | 1482             | 0.184 | $a'$     | $b_2$    | C-C ring stretch                     |
| $\nu_{25}$ | 1501             | 0.186 | $a'$     | $a_1$    | C-C ring stretch                     |
| $\nu_{26}$ | 1635             | 0.203 | $a'$     | $b_2$    | C-C ring stretch                     |
| $\nu_{27}$ | 1646             | 0.204 | $a'$     | $a_1$    | C-C ring stretch                     |
| $\nu_{28}$ | 3192             | 0.396 | $a'$     | $a_1$    | C-H stretch                          |
| $\nu_{29}$ | 3207             | 0.398 | $a'$     | $b_2$    | C-H stretch                          |
| $\nu_{30}$ | 3217             | 0.399 | $a'$     | $b_2$    | C-H stretch                          |
| $\nu_{31}$ | 3230             | 0.400 | $a'$     | $b_2$    | C-H stretch                          |
| $\nu_{32}$ | 3236             | 0.401 | $a'$     | $a_1$    | C-H stretch                          |
| $\nu_{33}$ | 3806             | 0.472 | $a'$     | $a_1$    | O-H stretch                          |

## 2 Vibronic Coupling Model Parameters

In the following tables, state numbering has the ground-state as 1. States 2,3, are the neutral  $S_1(^1B_2)$  and  $S_2(^1B_1)$  states, while states 4,5 are the cation states  $D_0(^2B_1)$  and  $D_1^2A_2$ ).

**SI-Table 2** On-diagonal linear coupling constants  $\kappa_k^{(i)}$  obtained by fitting the vibronic coupling model Hamiltonian to the adiabatic potentials and the vibrational normal mode frequencies  $\omega_k$ . All values are in eV.

| Mode       | $\omega_k$ | $\kappa_k^{(i)}$ |          |          |          |
|------------|------------|------------------|----------|----------|----------|
|            |            | (2)              | (3)      | (4)      | (5)      |
| $\nu_3$    | 0.04922    |                  |          |          |          |
| $\nu_4$    | 0.05034    |                  |          |          |          |
| $\nu_6$    | 0.06452    | -0.10616         | -0.02400 | -0.11791 | 0.05073  |
| $\nu_7$    | 0.07588    |                  |          |          |          |
| $\nu_{10}$ | 0.10067    | -0.09016         | 0.08000  | -0.00800 | -0.02000 |
| $\nu_{11}$ | 0.10129    |                  |          |          |          |
| $\nu_{13}$ | 0.11300    |                  |          |          |          |
| $\nu_{15}$ | 0.12376    | 0.00972          | 0.08400  | 0.00118  | -0.01128 |
| $\nu_{16}$ | 0.12836    | 0.01075          | 0.10100  | 0.01229  | 0.01687  |
| $\nu_{19}$ | 0.14577    | -0.06900         | -0.00600 | -0.04600 | 0.02000  |
| $\nu_{20}$ | 0.14803    | -0.18100         | -0.07600 | -0.12622 | -0.12171 |
| $\nu_{21}$ | 0.15707    | -0.14964         | -0.02000 | -0.01000 | -0.10000 |
| $\nu_{25}$ | 0.18608    | -0.11589         | -0.00464 | -0.04496 | -0.08291 |
| $\nu_{27}$ | 0.20406    | 0.13900          | -0.01305 | 0.20000  | -0.07014 |
| $\nu_{28}$ | 0.39576    | 0.46400          | -0.45500 | 0.00300  | -0.01200 |
| $\nu_{32}$ | 0.40100    | 0.14000          | -0.12200 | 0.00800  | -0.03400 |

**SI-Table 3** Off-diagonal linear coupling constants  $\lambda_k^{(i,j)}$  (in eV) obtained by fitting the vibronic coupling model Hamiltonian to the adiabatic potentials. Only values larger than 0.001 eV are listed.

| Mode       | $\lambda_k^{(i,j)}$ |        |
|------------|---------------------|--------|
|            | (2,3)               | (4,5)  |
| $\nu_3$    |                     | -0.100 |
| $\nu_4$    | 0.085               |        |
| $\nu_7$    |                     | 0.080  |
| $\nu_{11}$ | 0.140               |        |
| $\nu_{13}$ | 0.099               |        |

**SI-Table 4** On-diagonal bilinear coupling constants  $\gamma_{kk}^{(i)}$  (in eV) obtained by fitting the vibronic coupling model Hamiltonian to the adiabatic potentials.

| Mode       | $\gamma_{kk}^{(i)}$ |          |          |         |
|------------|---------------------|----------|----------|---------|
|            | (2)                 | (3)      | (4)      | (5)     |
| $\nu_3$    |                     |          | 0.02918  | 0.02305 |
| $\nu_4$    | 0.01000             | -0.02800 |          |         |
| $\nu_6$    | 0.00383             | -0.00111 | 0.00617  | 0.01234 |
| $\nu_7$    |                     |          | -0.00310 | 0.02637 |
| $\nu_{10}$ | 0.00771             | 0.00878  | 0.00708  | 0.01448 |
| $\nu_{11}$ | 0.07000             | 0.00900  |          |         |
| $\nu_{13}$ | 0.07200             | 0.01500  |          |         |
| $\nu_{15}$ | 0.01640             | 0.01572  | 0.01825  | 0.01532 |
| $\nu_{16}$ | 0.01871             | 0.01041  | 0.01848  | 0.01466 |
| $\nu_{19}$ | 0.04400             | 0.04600  | 0.04463  | 0.04455 |
| $\nu_{20}$ | 0.01800             | 0.07200  | 0.04947  | 0.06664 |
| $\nu_{21}$ | 0.01120             | 0.03111  | 0.03020  | 0.04694 |
| $\nu_{25}$ | 0.02563             | 0.02926  | 0.04001  | 0.05935 |
| $\nu_{27}$ | 0.00024             | 0.02990  | -0.01069 | 0.07536 |

**SI-Table 5** On-diagonal bilinear coupling constants  $\gamma_{km}^{(i)}$  (in eV) obtained by fitting the vibronic coupling model Hamiltonian to the adiabatic potentials.

| Mode          | $\gamma_{km}^{(i)}$ |          |          |          |
|---------------|---------------------|----------|----------|----------|
|               | (2)                 | (3)      | (4)      | (5)      |
| $\nu_{3,7}$   |                     |          | -0.01894 | -0.05213 |
| $\nu_{6,10}$  |                     |          | 0.01907  | 0.06142  |
| $\nu_{6,15}$  |                     |          | 0.00368  | 0.00950  |
| $\nu_{6,16}$  |                     |          | -0.00482 | -0.00969 |
| $\nu_{6,19}$  |                     |          | -0.01600 | 0.01900  |
| $\nu_{6,20}$  |                     |          | -0.01000 | 0.00500  |
| $\nu_{6,21}$  |                     |          | 0.01335  | 0.02000  |
| $\nu_{6,25}$  |                     |          |          | 0.00402  |
| $\nu_{6,27}$  | -0.00014            | 0.00014  | 0.00476  | -0.01000 |
| $\nu_{10,15}$ |                     |          | -0.00286 | -0.00688 |
| $\nu_{10,16}$ |                     |          | 0.00341  | 0.00699  |
| $\nu_{10,19}$ |                     |          | 0.01000  | 0.02400  |
| $\nu_{10,20}$ |                     |          | -0.00800 | 0.06000  |
| $\nu_{10,21}$ |                     |          | -0.00667 | -0.01911 |
| $\nu_{10,27}$ |                     | -0.00014 | -0.01005 | -0.03783 |
| $\nu_{15,16}$ |                     |          | 0.00032  | 0.00079  |
| $\nu_{15,20}$ |                     |          | -0.00300 | -0.01000 |
| $\nu_{15,21}$ | 0.00031             | 0.00033  | -0.00264 | -0.00426 |
| $\nu_{15,27}$ |                     | 0.00011  | -0.00331 | -0.00781 |
| $\nu_{16,20}$ |                     |          | 0.00400  | 0.01000  |
| $\nu_{16,21}$ |                     |          |          | 0.00212  |
| $\nu_{16,27}$ | 0.00013             | -0.00016 | 0.00339  | 0.00605  |
| $\nu_{19,20}$ |                     |          | 0.01713  | 0.04461  |
| $\nu_{19,21}$ |                     |          | 0.00491  | 0.01399  |
| $\nu_{19,27}$ |                     |          | 0.00966  | 0.02745  |
| $\nu_{20,21}$ |                     |          | -0.01427 | -0.02000 |
| $\nu_{20,27}$ |                     |          | -0.01609 | -0.02000 |
| $\nu_{21,25}$ |                     |          |          | -0.00132 |
| $\nu_{21,27}$ | -0.00043            | -0.00023 | -0.00981 | -0.02263 |
| $\nu_{25,27}$ |                     | -0.00019 |          | -0.00361 |
| $\nu_{28,32}$ | -0.10210            | -0.05320 |          |          |

**SI-Table 6** Numerical values of the parameters of the diabatic potentials for the  $r, \theta$  coordinates of the cationic states,  $D_0$  and  $D_1$ .

| $V_4$                           |                    |
|---------------------------------|--------------------|
| $D_e^4 = 4.63139$ eV            | $J_1 = 0.33$ eV    |
| $r_4 = 0.982916$ Å              | $J_2 = 0.29$ eV    |
| $a_4 = 2.31572$ Å <sup>-1</sup> | $J_3 = 0.044$ eV   |
| $a_{40} = 8.608$ eV             |                    |
| $V_5$                           |                    |
| $D_e^5 = 5.00107$ eV            | $K_1 = 0.08155$ eV |
| $r_5 = 0.975598$ Å              | $K_2 = 0.03136$ eV |
| $a_5 = 2.28858$ Å <sup>-1</sup> | $K_3 = 0.04872$ eV |
| $a_{50} = 9.38$ eV              |                    |
